# Supplementary material for: Automatic Detection of Freshwater Phytoplankton Specimens in Conventional Microscopy Images
Source: Sensors (Basel). 2020 Nov 23;20(22):6704. doi: 10.3390/s20226704 (PMC7700267; doi:10.3390/s20226704)
Supplement: Supplementary file 1 [file sensors-20-06704-s001.xlsx]

## Sheet: Hoja1
Species/Taxa		Cell concentration	Main taxonomic groups
		(cells ml-1)	(%)
Cyanoprokariota			24.95
Anabaena spiroides	Klebahn	321
Microcystis flos-aquae	(Wittrock) Kirchner	893
Woronichinia naegeliana	(Unger) Elenkin	1036
Bacillariophyceae			15.29
Asterionella formosa	Hassall	89
Aulacoseira granulata var armata	(Ehrenberg) Simonsen	644
Cocconeis placentula var euglypta	(Ehrenberg) Grunow	5
Cyclotella meneghiniana	Kützing	16
Cymbella aspera	(Ehrenberg) Cleve	3
Fragilaria crotonensis	Kitton	610
Synedra ulna	(Nitzsch) Ehrenberg	12
Chrysophyceae			1.24
Dinobryon sociale	(Ehrenberg) Ehrenberg	112
Euglenophyceae			0.54
Lepocinclis oxyuris	(Schmarda) B.Marin & Melkonian	11
Phacus longicauda	(Ehrenberg) Dujardin	8
Trachelomonas superba	Svirenko	5
Trachelomonas volvocinopsis	Svirenko	22
Trachelomonas sp. 1	Ehrenberg	3
Dinophyceae			0.43
Gymnodinium sp.	F.Stein	9
Peridinium umbonatum	F.Stein	23
Peridinium willei	Huitfeldt-Kaas	7
Charophyta			0.78
Closterium venus	Kützing ex Ralfs	5
Cosmarium botrytis	Meneghini ex Ralfs	2
Cosmarium margaritatum	(P.Lundell) J.Roy & Bisset	3
Cosmarium phaseolus	Brébisson ex Ralfs	4
Pleurotaenium coronatum	(Brébisson) Rabenhorst	3
Staurastrum dejectum	Brébisson	5
Staurastrum lunatum	Ralfs	2
Staurastrum margaritaceum	Meneghini ex Ralfs	2
Staurastrum planctonicum	Teiling	1
Staurastrum tohopekaligense	Wolle	10
Staurodesmus convergens	(Ehrenberg ex Ralfs) S.Lillieroth	21
Staurodesmus incus	(Hassal ex Ralfs) Teiling	3
Spondylosium planum	(Wolle) West & G.S.West	9
Chlorophyceae			56.77
Ankistrodesmus fasciculatus	(Lundberg) Komárková-Legnerová	7
Asterococcus superbus	(Cienkowski) Scherffel	8
Botryococcus braunii	Kützing	516
Chloroccocales		72
Coelastrum microporum	Nägeli	148
Crucigenia tetrapedia	(Kirchner) Kuntze	6
Crucigeniella crucifera	(Wolle) Komárek	4
Dictyosphaerium pulchellum	H.C.Wood	211
Eudorina elegans	Ehrenberg	68
Kirchneriella lunaris	(Kirchner) Möbius	46
Monoraphidium contortum	(Thuret) Komárková-Legnerová	5
Oocystis borgei	J.W.Snow	28
Pandorina morum	(O.F.Müller) Bory	60
Pediastrum tetras	(Ehrenberg) Ralfs	12
Scenedesmus opolensis (occasionally just 2 cells)	P.G.Richter	16
Scenedesmus arcuatus	Lemmermann	44
Stylosphaeridium stipitatum	(Bachmann) Geitler & Gimesi	9
Tetraedron minutum	(A.Braun) Hansgirg	5
Volvox aureus	Ehrenberg	3854
Total		9018
